1 **Monitoring COVID-19 transmission risks by RT-PCR tracing of droplets in hospital and**  
2 **living environments**

3 Andrea Piana<sup>a</sup>, Maria Eugenia Colucci<sup>b</sup>, Federica Valeriani<sup>c</sup>, Adriano Marcolongo<sup>d</sup>, Giovanni  
4 Sotgiu<sup>a</sup>, Cesira Pasquarella<sup>b</sup>, Lory Marika Margarucci<sup>c</sup>, Andrea Petrucca<sup>d</sup>, Gianluca  
5 Gianfranceschi<sup>c</sup>, Sergio Babudieri<sup>a</sup>, Pietro Vitali<sup>b</sup>, Giuseppe D'Ermo<sup>e</sup>, Assunta Bizzarro<sup>b</sup>, Flavio  
6 De Maio<sup>f</sup>, Matteo Vitali<sup>g</sup>, Antonio Azara<sup>a</sup>, Ferdinando Romano<sup>g</sup>, Maurizio Simmaco<sup>e</sup>, Vincenzo  
7 Romano Spica<sup>c\*</sup>

8 <sup>a</sup> Department of Medical, Surgical and Experimental Sciences, University of Sassari, Viale San  
9 Pietro, 43, 07100 Sassari, Italy. (piana@uniss.it; gsotgiu@uniss.it; babuder@uniss.it,  
10 azara@uniss.it)

11 <sup>b</sup> Department of Medicine and Surgery, University Hospital, University of Parma, Via Gramsci,  
12 14, 43126, Parma, Italy (cesiraisabellamaria.pasquarella@unipr.it;  
13 mariaeugenia.colucci@unipr.it; assunta.bizzarro@unipr.it; pvitali@ao.pr.it)

14 <sup>c</sup> Department of Movement, Human and Health Sciences, Unit of Public Health-Laboratory of  
15 Epidemiology and Biotechnologies, University of Rome "Foro Italico", Piazza Lauro de Bosis  
16 6, 00135 Rome, Italy (vincenzo.romanospica@uniroma4.it; federica.valeriani@uniroma4.it;  
17 l.margarucci@studenti.uniroma4.it; gianluca.gianfranceschi@uniroma4.it)

18 <sup>d</sup> Sant'Andrea Hospital, Sapienza University of Rome, Rome, Italy  
19 (maurizio.simmaco@uniroma1.it; andrea\_petrucca@yahoo.com;  
20 marcolongo@ospedalesantandrea.it)

21 <sup>e</sup> Department of Surgery, Sapienza University of Rome, Rome, Italy  
22 (giuseppe.dermo@uniroma1.it)

23 <sup>f</sup> Dipartimento di Scienze biotecnologiche di base, cliniche intensivologiche e perioperatorie ó  
24 Sezione di Microbiologia, Università Cattolica del Sacro Cuore, Rome, Italy,  
25 (flavio.demaio@unicatt.it)

26 <sup>g</sup> Department of Public Health and Infectious Diseases, University of Rome La Sapienza, Rome,  
27 Italy (matteo.vitali@uniroma1.it; ferdinando.romano@uniroma1.it)

28 \*Corresponding: Vincenzo Romano Spica; Laboratory of Department of Movement, Human and  
29 Health Sciences; University of Rome "Foro Italico", Piazza Lauro De Bosis 6, 00135 Rome, Italy,  
30 E-mail: vincenzo.romanospica@uniroma4.it

31 **Keywords:** SARS-CoV-2; Environmental contamination; Fomite; Droplets; Biological fluids;  
32 Microbiota. **Running:** COVID-19 and droplets contamination

33  
34  
35  
36  
37  
38  
39  
40  
41  
42  
43  
44  
45  
46  
47  
48  
49  
50  
51  
52  
53  
54  
55  
56

## ABSTRACT

SARS-CoV-2 environmental contamination occurs through droplets and biological fluids released in the surroundings from patients or asymptomatic carriers. Surfaces and objects contaminated by saliva or nose secretions represent a risk for indirect transmission of COVID-19. We assayed surfaces from hospital and living spaces to identify the presence of viral RNA and the spread of fomites in the environment. Anthropogenic contamination by droplets and biological fluids was monitored by detecting the microbiota signature using multiplex RT-PCR on selected species and massive sequencing on 16S-amplicons.

A total of 92 samples (flocked swab) were collected from critical areas during the pandemic, including indoor (3 hospitals and 3 public buildings) and outdoor surfaces exposed to anthropogenic contamination (handles and handrails, playgrounds). Traces of biological fluids were frequently detected in spaces open to the public and on objects that are touched with the hands (>80%). However, viral RNA was not detected in hospital wards or other indoor and outdoor surfaces either in the air system of a COVID-hospital, but only in the surroundings of an infected patient, in consistent association with droplets traces and fomites. Handled objects accumulated the highest level of multiple contaminations by saliva, nose secretions and faecal traces, further supporting the priority role of handwashing in prevention.

In conclusion, anthropogenic contamination by droplets and biological fluids is widespread in spaces open to the public and can be traced by RT-PCR. Monitoring fomites can support evaluation of indirect transmission risks for Coronavirus or other flu-like viruses in the environment.

57

58 **Importance**

59 Several studies searched for SARS-CoV-2 in the environment because saliva and nasopharyngeal  
60 droplets can land on objects and surfaces creating fomites. However, the ideal indicator would be  
61 the detection of the biofluid. This approach was not yet considered, but follows a traditional  
62 principle in hygiene, using indicators rather than pathogens. We searched for viral RNA but also  
63 for droplets on surfaces at risk. For the first time, we propose to monitor droplets through their  
64 microbiota, by RT-PCR or NGS.

65 Even if performed during the pandemic, SARS-CoV-2 wasn't largely spread on surfaces, unless  
66 in proximity of an infectious patient. However, anthropic contamination was frequently at high  
67 level, suggesting a putative marker for indirect transmission and risk assessment. Moreover, all  
68 SARS-CoV-2- contaminated surfaces showed the droplets' microbiota.

69 Fomites detection may have an impact on public health, supporting prevention of indirect  
70 transmission also for other communicable diseases such as Flu and Flu-like infections.

71

72

73

74  
75  
76  
77  
78  
79  
80  
81

**GRAPHICAL ABSTRACT**

**Monitoring SARS-CoV-2 transmission risk by tracing droplets and fomites using RT-PCR**

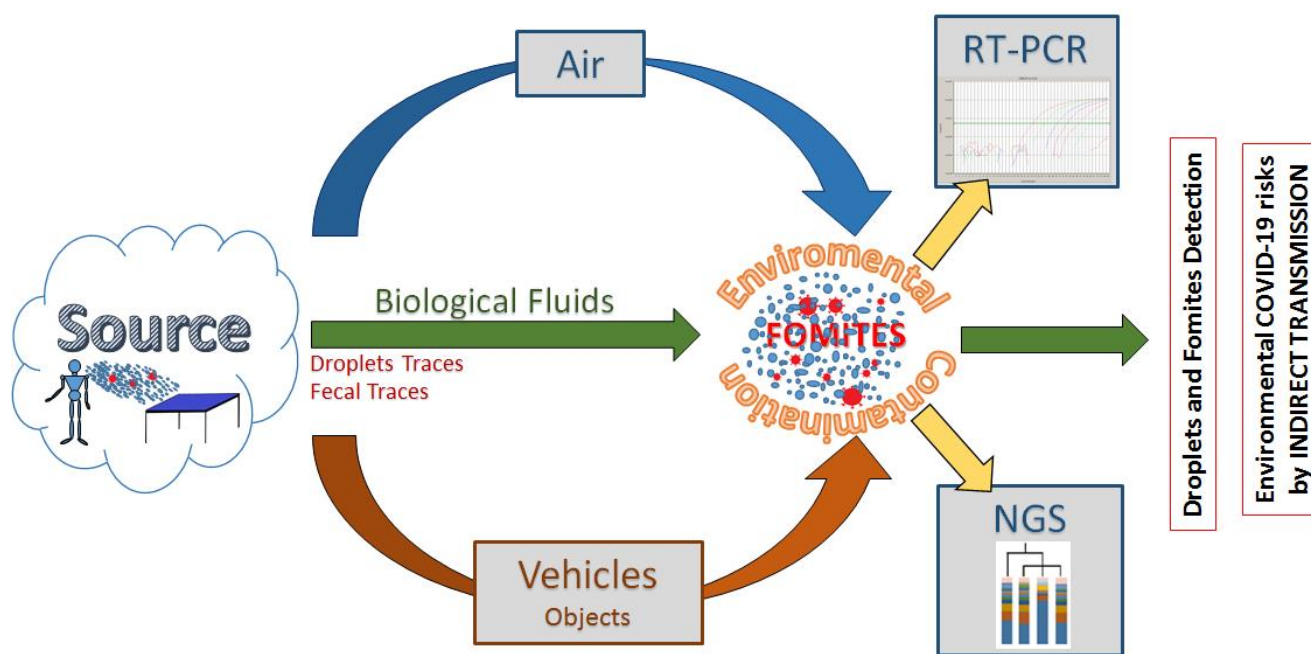

82

## 83 **1 Introduction**

84 The ongoing pandemic of coronavirus disease 2019 (COVID-19) is thought to have spread mainly  
85 through a direct route of transmission: by person to person close contact and inhalation of virus-  
86 laden liquid droplets (WHO, 2020; Stadnytskyi et al., 2020; Somsen et al., 2020; Liu et al., 2020;  
87 NCIRD, 2020; Asadi et al, 2020). However, it is also recognised that Severe Acute Respiratory  
88 Syndrome Coronavirus 2 (SARS-CoV-2) can follow an indirect route of transmission through  
89 environmental contamination of objects and surfaces, being carried by biological fluids such as  
90 saliva, nose secretions, and feces, in which viral RNA was consistently detected (Van Doremalen,  
91 et al., 2020; Chia et al., 2020; Guo, et al., 2020; Cheng et al., 2020; Ong et al., 2020; Lv et al.,  
92 2020; Razzini et al., 2020; Li et al., 2020; Chen et al., 2020; Foladori et al., 2020). Respiratory  
93 droplets (aerodynamic diameter ranging between  $>5$  and  $10\ \mu\text{m}$ ) and droplet nuclei or aerosols ( $\bar{O}$   
94  $5\ \mu\text{m}$ ) from a patient or an asymptomatic subject can reach directly the mouth, nose or eyes of a  
95 susceptible person, but can also land in the surroundings, creating contaminated surfaces, namely  
96 fomites (WHO, 2014; Wei et al., 2020; Otter et al., 2016; Al Huraimel et al., 2020). The risk of an  
97 indirect transmission through contaminated surfaces is related to the capability of the coronavirus  
98 to survive on different matrices under different conditions, persisting from hours to days,  
99 especially in indoor environments (Eslami and Jalili. 2020; Kampf et al., 2020; Hung et al., 2020).

100 The question of evaluating the level of environmental contamination is important not only during  
101 outbreaks and the epidemic peak, but also during the transition phases, when asymptomatic  
102 infected carriers may release the virus in the environment by talking, coughing, sneezing, touching  
103 objects and consequently spreading contaminated biofluids (including saliva and nose secretions,  
104 faecal traces or droplets) (Kampf et al., 2020; Hung et al., 2020; Wu et al., 2020). This issue has  
105 already been considered in higher-risk environments such as hospitals and public areas, where

106 SARS-CoV-2 was clearly detected in several studies, even when surveillance and sanitation were  
107 accurately performed (Wu et al., 2020; Wang et al. 2020).

108 Finally, when approaching the question of the presence of SARS-CoV-2 in the environment, we  
109 need to consider that the pathogen is conveyed by biological fluids. Therefore, the possibility of  
110 detecting fomites and biological fluids in the environment becomes both a potential marker of  
111 hygiene levels, and also a candidate indicator for indirect COVID-19 transmission risks. Starting  
112 from this working hypothesis, we surveyed hospitals and public buildings not simply for the  
113 presence of SARS-CoV-2, but also for the presence of droplets, fomites and anthropic  
114 contaminations, by searching traces of the microbiota signature of their own biological fluids of  
115 origin. To address this issue, a dedicated set of primers and probes was combined to detect different  
116 biological fluids based on multiplex reactions in real-time PCR (RT-PCR), following a strategy  
117 initially developed for forensic studies and hospital hygiene (Giampaoli et al., 2012; Giampaoli et  
118 al., 2014; Valeriani et al., 2016; Valeriani et al., 2018a; Yao et al., 2020). Thus, a same general  
119 approach based on RT-PCR was considered to test both the viral RNA by standard procedures and  
120 the DNA from fomites by microbiota signature. The general principle is based on the amplification  
121 of genes from at least one representative bacterial component of the biological fluid, e.g.  
122 amplifying bacterial genes from *E. salivarius* and *S. mutans* for targeting saliva, or  
123 *Corynebacterium* for nose secretions, or *E. faecalis* and *Bacteroides* for evaluating the presence  
124 of faecal traces, as previously shown (Esberg et al., 2020; Liu et al., 2020; Charles et al., 2019;  
125 Proctor et al., 2019; Lloyd-Price, J et al., 2016). This approach can be confirmed by next generation  
126 sequencing (NGS), analysing the whole microflora DNA (mfDNA) as sampled with  
127 environmental swabs on indoor and outdoor surfaces (Slatko et al., 2018; Valeriani et al., 2018b;  
128 Valeriani et al., 2018c; Valeriani et al., 2019; Mucci et al., 2020).

129 The overall aim of this study was to search for both SARS-CoV-2 and fomites in hospitals and  
130 public buildings, to evaluate the possibility of monitoring by RT-PCR fomites and biofluid  
131 contamination, as a novel indicator of hygiene as well as a candidate marker for indirect  
132 transmission risks for COVID-19.

133

134

## 135 **2. Materials and Methods**

### 136 **2.1. Sampling and experimental design**

137 Surfaces at risk for the presence of biological fluids and the transmission of COVID-19 were  
138 sampled from different settings, both in indoor and outdoor areas. Environmental samples (n=94)  
139 were collected after the epidemic peak in Italy (May-June 2020). We sampled indoor surfaces from  
140 three COVID-reference hospitals in three Italian regions (Parma, Emilia-Romagna; Sassari,  
141 Sardinia; Rome, Lazio); buildings open to public use (1 office, 1 fast food, 1 church); outdoor  
142 areas; and used handkerchiefs with nasopharyngeal secretions. Samples were tested for SARS-  
143 CoV-2 RNA, whereas anthropic contamination was assessed searching for biological fluids of  
144 nose, mouth, gut through their microbiota traces by RT-PCR and/or NGS (Table 1).

145

### 146 **2.2. Sampling collection**

147 Surface sampling was carried out after their use and prolonged exposure to human presence (>4h).  
148 Following standard protocols, FLOGSwabs and CITOSSWAB were used and soaked into a buffer  
149 solution in a volume of 400 µl of UTM-RM transport medium (Copan Diagnostics Inc., Murrieta,  
150 CA, USA). The nasopharyngeal secretions were collected on handkerchiefs with swabs  
151 (4N6FLOQSwabs, Copan Diagnostics Inc., Murrieta, CA, USA). All specimens were refrigerated  
152 at 4°C if testing could postpone in the following days.

153

### 154 **2.3. SARS-CoV-2 detection**

155 All samples in UTM were heat inactivated at 56°C for 5 minutes to reduce the risk of accidental  
156 transmission of SARS-CoV-2 to laboratory personnel. Nucleic acids were purified and extracted  
157 using the eMag automated nucleic acid sample extraction system (bioMérieux, Marcy l'Étoile,  
158 France). Briefly, total nucleic acids were extracted from UTM using an input sample volume of  
159 200 µl into 2,000 µl of easyMag lysis buffer using B protocol to a final eluted volume of purified  
160 nucleic acids of 50 µl. TaqPath 1-step reverse transcriptase quantitative PCR (RT-qPCR) master  
161 mix (Life Technologies, Frederick, MD) and the 2019-nCoV CDC EUA kit (Integrated DNA  
162 Technologies, Coralville, IA) were used for target detection (CDC, 2020). Molecular detection of  
163 SARS-CoV-2 RNA was carried out by rRT-PCR, using primers and probes related to the E gene,  
164 with a detection limit of 5.2 copies of RNA/reaction (Corman V. 2019). Samples were analyzed  
165 in Sassari and Parma with the Allplex 2019-nCoV assay (Seegene, Seoul, South Korea) and in  
166 Rome with the Detection Kit for 2019 Novel Coronavirus (2019-nCoV) RNA (PCR-Fluorescence  
167 Probing) (Daan Gene Co., Ltd of Sun Yat-University, Guangzhou, Guandong, China) for the  
168 confirmation of the results. The Allplex 2019-nCoV assay was designed for amplifying three viral  
169 targets: the E gene (subgenus Sarbecovirus), the N, and the RdRP genes (Farfour, 2020). The  
170 Detection Kit for 2019 Novel Coronavirus (2019-nCoV) RNA (PCR-Fluorescence Probing) is a  
171 CE-marked RT-PCR assay which simultaneously detects the viral nucleocapsid N and Orf1ab  
172 genes. Afterward, 5 µl of eluted RNA samples in a total volume of 25 µl were RT-PCR amplified  
173 on Biorad CFX96 real-time system. In each round of extraction and amplification, positive and  
174 negative control samples (supplied by the manufacturer) were included. The interpretation criteria  
175 were the following: 1) positive signals detected in ORF1ab and N genes with a cycle threshold  
176 (Ct) values  $\leq 40$  were considered positive for SARS-CoV-2 RNA; 2) positive signals in only one



177 gene (N or Orf1ab) with a Ct values  $\leq 40$  were considered inconclusive; and 3) no fluorescent  
178 signals or over the 40th Ct in ORF1ab and N genes were considered not specific and reported as  
179 negative for SARS-CoV-2 RNA. The declared LoD is 500 RNA copies/ml.

180

#### 181 **2.4. DNA extraction**

182 An aliquot of COPAN UTM-RM transport medium (about 300  $\mu$ L) was centrifugated at 16000 g  
183 for 10 minutes and the pellet was manually disaggregated with a pestle after adding glass beads  
184 (Sigma-Aldrich, St Louis, MO) and lysed in 200  $\mu$ L lysozyme solution, RNase A treated, and  
185 proteinase K digested according to the GenElute Bacterial Genomic DNA Kit (Sigma Aldrich, St  
186 Louis, USA). Finally, DNA elution was performed in 60  $\mu$ L elution solution (10 mM  
187 tris(hydroxymethyl)aminomethane-hydrochloride and 0.5mM ethylene diamine tetra acetic acid,  
188 pH 9.0). For pharyngeal biofluids and fomites samples, each swab was inserted into the  
189 semipermeable NAO Baskets and broken inside at the breakpoint. Approximately 200  $\mu$ L  
190 lysozyme solution (20mg/mL Lisozima, 20 mM tris[hydroxymethyl]aminomethanehydrochloride  
191 at pH 8, 2mM ethylenediaminetetraacetic acid, and 1.2% TritonX-100; Sigma Aldrich, St Louis,  
192 USA) were added into the NAO Baskets and incubated a 37°C for 30 minutes. Then, 20  $\mu$ L  
193 proteinase K and 400  $\mu$ L buffer AL were added and the sample was centrifuged at 10,000  $\times$  g for  
194 1 minute, allowing the elution of the digestion solution. After incubation at 56°C for 10 minutes  
195 and addition of 400  $\mu$ L ethanol, the washing step and DNA purification were performed in  
196 accordance with the manufacturer's instructions. DNA elution was completed in 60  $\mu$ L elution  
197 solution (10 mM tris[hydroxymethyl]aminomethane-hydrochloride and 0.5 mM  
198 ethylenediaminetetraacetic acid at pH 9.0), as previously described (Cianfanelli et al., 2017;  
199 Valeriani et al., 2017; Valeriani et al., 2018c;).

200

## 201 **2.5. Analysis of mfdNA by multiplex real-time PCR and data interpretation**

202 Amplifications were combined in 4 multiplex reactions: mix Skin, for the identification of  
203 *Staphylococcus aureus* and *Staphylococcus epidermidis*; mix Nasopharynx for *Propionibacterium*  
204 *spp.* and *Corynebacterium spp.*; Mix oralpharinx for *Streptococcus salivarius* and *Streptococcus*  
205 *mutans*; mix feces for *Enterococcus spp* and *Bacteroides vulgatus* (probes were labeled  
206 FAM/VIC/HEX, with the BHQ-1quencher). Primers for different bacterial indicators and  
207 optimized reaction conditions were already established, as previously described (Elshi et al., 2000;  
208 Giampaoli et al., 2012; Chung et al., 2016; Valeriani et al. 2018a; Byrd et al., 2018; Liu, Q. 2020).  
209 Briefly, amplifications were performed in a volume of 25  $\mu$ L, of which 12.5  $\mu$ L JumpStart Taq  
210 ReadyMix for Quantitative PCR (Sigma Aldrich, St. Louis, MO), containing 900nM forward and  
211 reverse primers, and 250 nM of each probe. For each mix, samples were tested in triplicate. The  
212 amplifications were performed using Bio-RadCFX96(Bio-Rad,Hercules, CA) programmed for 10  
213 minutes at 95°C and 40 cycles of 15 seconds at 95°C and 1 minute at 60°C. For each sample 11  
214  $\mu$ L template reaction was amplified. The PCR output was expressed as cycle threshold (CT).  
215 Positive samples were those where  $\times 1$  positive indicator (CT  $\leq 35$ ) was found in at least 2 mixes.  
216 Conversely, a microbial indicator was considered negative when over the CT  $\times 39$  threshold.

217

## 218 **2.5. 16S rDNA Amplicon sequencing analysis**

219 Libraries for NGS were prepared according to the 16S Metagenomic Sequencing Library  
220 Preparation Guide (part# 15044223 rev A; Illumina, San Diego, CA, USA). The PCR amplicons  
221 were obtained using Ba27F and Ba338R primers containing overhang adapters, as previously  
222 described (40, 41). Tagged PCR products were generated using primer pairs with unique barcodes  
223 through two-step PCR. In this strategy, target primers containing overhang adapters were used in  
224 the first PCR reaction to amplify the target gene, that product was then used in the second PCR

225 using primers-containing barcodes. Each amplification reaction had a total volume of 25  $\mu$ L,  
226 containing 12.5  $\mu$ L of KAPA HiFi Hot Start Ready Mix (Roche, Pleasanton, CA, USA), 5  $\mu$ L of  
227 each primer (1  $\mu$ M), and 2  $\mu$ L of template DNA. Reactions were carried out on a Techne@TC-  
228 PLUS thermocycler (VWR International, LLC, Radnor, PA, USA). Following amplification, 5  $\mu$ L  
229 of PCR product from each reaction was used for agarose gel (1%) electrophoresis to confirm  
230 amplification. The final concentration of cleaned DNA amplicon was determined using the Qubit  
231 PicoGreen dsDNA BR assay kit (Invitrogen, Grand Island, NY, USA) and validated on a  
232 Bioanalyzer DNA 1000 chip (Agilent, Santa Clara, CA, USA). Libraries were prepared using the  
233 MiSeq Reagent Kit Preparation Guide (Illumina, San Diego, CA, USA). Raw sequence data was  
234 processed using an in-house pipeline that was built on the Galaxy platform and incorporated  
235 various software tools to evaluate the quality of the raw sequence data (FASTA/Q Information  
236 tools, Mothur). All datasets were rigorously screened to remove low-quality reads (short reads  
237 >200 nt, zero-ambiguous sequences). Demultiplexing was performed to remove PhiX sequences  
238 and sort sequences; moreover, to minimize sequencing errors and ensure sequence quality, the  
239 reads were trimmed based on the sequence quality score using Btrim (an average quality score of  
240 30 from the ends, and remove reads that are less any 200 bp after end-trimming) (Kong, 2011).  
241 OTUs (operational taxonomic units) were clustered at a 97% similarity level, and final OTUs were  
242 generated based on the clustering results, and taxonomic annotations of individual OTUs were  
243 based on representative sequences using RDP's 16S Classifier 2.5. Observed OTUs were defined  
244 as observed species. A level of 97% sequence identity is often chosen as representative of a species  
245 and 95% for a genus. The sequence reads were analyzed, also, in the cloud environment BaseSpace  
246 through the 16S Metagenomics app (version 1.0.1; Illumina®): the taxonomic database used was  
247 the Illumina-curated version (May 2013 release of the Greengenes Consortium Database) (Wang  
248 et al., 2013).

249

## 250 **2.6. Statistical Analysis**

251 Relative abundances of community members were determined with rarefied data and summarized  
252 at each taxonomic level. The proportion of the microbiome at each taxonomic rank, such as  
253 phylum, order, class, family, and genus, was determined using the RDP classifier and the  
254 Greengenes Database. Alpha and beta diversity were calculated using EstimateS software at a level  
255 of 97% sequence similarity. Regarding alpha diversity, the Shannon index and equitability index  
256 at the species level were computed (Colwell et al., 2012; Magurran, 2016). Principal component  
257 analysis (PCA) was performed using the METAGENassist platform and R (version 3.1.3,  
258 [www.R-project.org](http://www.R-project.org)) with packages *ggplot2*, *dape*, *psych* and *vegan* (Arndt et al., 2012).  
259 Multivariate analysis, the PCA, and partial least square-discriminant analysis (PLS-DA) were  
260 performed in order to investigate the dissimilarity between groups. Feature selection was  
261 performed using PLS-DA and 10-fold cross validation to tune algorithm parameters and to check  
262 model validity. Dendrogram and clustering analysis were based on the Euclidean distance and  
263 Ward's method.

264

## 265 **3. Results and discussion**

### 266 *3.1 Detection of fomites by RT-PCR*

267 Anthropogenic contamination by droplets and biofluids was detected on different environmental  
268 surfaces by RT-PCR (Table 2). The presence of fomites appeared largely diffused in indoor and  
269 outdoor areas exposed to human crowding or frequently touched with hands. Floors and walls were  
270 less contaminated than handles or buttons. Droplets DNA traces were detected in most of surfaces  
271 and almost 10% of sampled points displayed a multiple contamination from different biological

272 fluids. Correlation between selected bacterial species and biological fluids in droplets and fomites  
273 was confirmed (p-value <0.01) (Table 3), supporting the effectiveness of the approach. The  
274 combined action of different markers is synergic (Figure 1), allowing a reliable identification of  
275 droplets and fomites. Indoor and outdoor samples showed the presence of traces from one or more  
276 human biofluids, although with different intensity. Being a quantitative approach, indeed, RT-PCR  
277 can provide not only a qualitative output for the presence of droplets traces, but also an indication  
278 on the contamination level, allowing to set different thresholds or report CT data in the form of  
279 genomic units. However, the definition of a more precise quantitative interpretation of the  
280 multiplex amplification output would require a larger exploitation of the method, based on  
281 different environments, monitoring purposes or expected hygiene levels. The procedure to extract  
282 nucleic acid and detect anthropic contamination from environmental swabs could be automatize,  
283 likewise already done for testing SARS-CoV-2 from human swabs; therefore, detection of fomites  
284 by RT-PCR seems a feasible and promising approach even on a larger scale.

285

### 286 *3.2 SARS-CoV-2 in hospitals and public places*

287 SARS-CoV-2 was not detected in most of the sampling points, both indoor and outdoor. It was not  
288 found in all 15 sampling points within the air system of a COVID-19 hospital. SARS-CoV-2 RNA  
289 was detected only in one room where an infected patient was hospitalized and only in those  
290 samples collected near to the patient (one on the bed rail and one on the surface of the call button).  
291 The stethoscope used on the patient was positive, too. The low frequency (<4%) of positive  
292 samples in comparison with other studies (20-30%) can be associated to differences in the  
293 sampling strategy or to a lower sensitivity of the method (Liu, Y., 2020); moreover, it depends on  
294 the epidemiological scenario when the study was carried out, at time when reopening of activities

295 was carefully surveilled and preventive measures were strictly enforced (Pasquarella, 2020; Di  
296 Maria, 2020; Veronesi, 2020; Van Doremalen, et al., 2020; Chia et al., 2020; Guo, et al., 2020;  
297 Cheng et al., 2020; Ong et al., 2020; Lv et al., 2020; Razzini et al., 2020; Li et al., 2020; Chen et  
298 al., 2020; Foladori et al., 2020; Wei et al., 2020). From our findings, it seems that the  
299 environmental spread of SARS-CoV-2 was not widely diffused, with the only exception of the  
300 surfaces near a hospitalized infected patient.

301

### 302 *3.3 NGS analysis.*

303 The microbial signature obtained by RT-PCR was confirmed by NGS and all selected bacterial  
304 indicators were also included within the microbiota identified by high-throughput sequencing and  
305 bioinformatic analysis. RT-PCR and NGS characterized environmental samples based on their  
306 contamination patterns: by CT analysis on selected marker genes or by reads count on all 16S  
307 amplicon sequences, respectively (Figures 2 and 3). DNA test can be easily performed within one  
308 day on any real time apparatus, whereas NGS within one week adapting the laboratory protocol to  
309 the high throughput sequencer and accomplishing the required bioinformatic evaluation on the  
310 obtained data. However, NGS provides the 16S rDNA sequences of all the bacterial species in the  
311 sample, so that any anthropic contamination can represent just only a minority of the resident or  
312 acquired microflora on a surface. Therefore, each selected indicator specifically amplified by RT-  
313 PCR was observed by NGS, but only as a subcomponent between others (about 200-1000 species  
314 for each sample), including the unknown species (about 5-10%). Mean values ranged from 0.24%  
315 (*Bacteroides*) to 5.78% (*Corynebacterium*). For example, *Corynebacterium* showed lower values  
316 (<1%) in environmental samples exposed to multiple sources of microbial pollutions, whereas the  
317 highest values (35-80%) were observe in environmental swabs collected from human

318 nasopharyngeal secretions, further confirming the specific role of that marker within the microbial  
319 signature of the biological fluid. Nevertheless, both methods provided similar dendrograms. The  
320 correspondence between RT-PCR and NGS was reliable: two independent SARS-CoV-2 positive  
321 samples (YH1\_01 and YH1\_05) collected from same patient surroundings closely gathered,  
322 whereas the sample collected from the stethoscope used on the same patient (YH1\_12) segregated  
323 at a different distance, in both dendrograms. Indeed, the anthropic contaminations present on the  
324 right side of the bed (YH1\_01) and on the call bottom (YH1\_05) showed a similar biodiversity  
325 pattern (as also shown by the Shannon index 2.602 and 2.893, respectively), characterized by the  
326 presence of traces from different biofluids, suggesting a possible contamination through the patient  
327 right hand. Conversely, sample YH1\_12 displayed microbiota traces mainly restricted to  
328 nasopharyngeal secretions and with a different biodiversity pattern (Shannon index 2.161),  
329 suggesting a possible contact of the stethoscope on the patient chest (probably contaminated after  
330 a sneeze without keeping the mask). Eventually, NGS provided a more comprehensive overview  
331 of all the environmental bacteria present on the sampled surfaces, confirming also those coming  
332 from the microbiota of human biological fluids.

333

### 334 *3.4 Fomites and environmental microflora*

335 Environmental contamination through droplets or biofluids that can convey SARS-CoV-2  
336 represents an additional component of the complex microflora detectable on a surface. Indeed, the  
337 identification of fomites by RT-PCR analysis of selected indicators emphasizes a very specific -  
338 and often minority- component of the resident or ectopic microflora. The analysis of the dataset  
339 by NGS showed not only the wide presence of fomites on several surfaces exposed to anthropic  
340 contamination, but also the inhabiting microorganisms or those from other environmental sources.

341 Samples collected from indoor and outdoor surfaces gathered independently from human biofluids  
342 (Figure 5). Within the outdoor group, those with a higher anthropic contamination overlapped with  
343 indoor samples, far from those where the environmental component was overwhelming.  
344 Interestingly, only an outdoor sample segregated outside -and in between- of both groups: the  
345 external handle of the entrance of a public building (Z\_04), characterized by multiple  
346 contaminations of anthropic origin overlaying the outside microflora. Other indoor samples  
347 grouped together. These findings support the utility of microbiota data for tracing fomites in  
348 environmental samples and can sustain risk assessment for an indirect transmission of COVID-19.  
349 Nevertheless, the detection of traces of biological fluids in several environmental surfaces did not  
350 predict the presence of SARS-CoV-2, unless in virus positive points, even if sampling occurred  
351 during the pandemic period and in hospitals where COVID-19 patients were treated. Therefore, if  
352 fomites represent a risk themselves, the possibility for a contagion relays on the presence of the  
353 specific pathogen and its viability, satisfying the principles from the ancient Koch's postulates  
354 (Segre, 2013). Moreover, even if detectable through its RNA, the environmental survival of SARS-  
355 CoV-2 depends on different indoor and outdoor factors, including sanitation, time from the release  
356 of the biological fluid, exposure to agents such as humidity, temperature, air circulation and  
357 sunlight (Aboubakr, 2020; Morawska, 2020; Yolitz, 2020; Ratnesar-Shumate, 2020; Biryukov,  
358 2020). Therefore, viral infectivity can vary significantly between different environments and  
359 detection of fomites should be considered more as a putative indicator of transmission risk levels,  
360 than a danger itself. Monitoring droplets and biofluids by RT-PCR can help to prevent SARS-  
361 CoV-2 transmission by improving environmental surveillance and enforcing hygiene and  
362 sanitization procedures.

363



364 *3.5 Critical issues and limits of the study*

365 Even if several surfaces at risk of indirect transmission were evaluated, the study aim was not the  
366 quantification of the infectious risk. Comparisons between sampling points or buildings cannot be  
367 performed, not only for the sample size but also for the random collection from areas with a  
368 different incidence of disease. Indeed, different Italian regions were selected to avoid geographical  
369 bias, but different epidemiological burdens can affect the generalizability of the results. Therefore,  
370 we have simply reported an environmental scenario, suggesting a possible strategy to assess  
371 contaminations at risk for indirect transmission of COVID-19. Interestingly, SARS-CoV-2  
372 positive samples were collected only in Emilia-Romagna, a region with the highest number of  
373 cases in Italy (Veronesi et al., 2020). Thus, this is not an epidemiological study aimed at comparing  
374 geographical areas or quantify a risk for a specific environment or sampled surface. Nevertheless,  
375 observed data clearly identify surfaces at risk and confirm the fundamental role played by hands.  
376 Regarding the chosen approach, RT-PCR is faster than NGS (3-5 hours vs 5-10 days), but still is  
377 not instantaneous, as other strategies aimed to detect contaminations on surfaces or medical  
378 devices (Valeriani, 2018 a; Lee, 2020). Tracing droplets and identifying biological fluids by RT-  
379 PCR or NGS is specific respect to other methods based on finding organic matter without a  
380 recognition of their origin, e.g. from human secretions rather than human cells, plant, animal or  
381 bacterial debris. Therefore, detection of droplets by RT-PCR is not a generic marker of hygiene  
382 but can find specific application also in assessing environmental risks for other communicable  
383 diseases following an indirect rout of transmission, such as flu-like infections (Otter et al., 2016;  
384 Petersen, 2020; Wei et al., 2020).

385 Another limitation concerns the set of experimental conditions for RT-PCR and NGS. Primers and  
386 probes for selected bacterial genes from selected bacterial markers where chosen because of their

387 feasibility and effectiveness, but we did not made comparisons with different sequences, indicators  
388 or reaction conditions for RT-PCR. The same concern can be raised for the NGS approach, which  
389 was adopted for the analysis of 16S rDNA amplicon sequencing, following standard protocols. A  
390 whole genome analysis would have been more informative. However, it would have also been  
391 more expensive for materials and bioinformatic analysis, being less appropriate for public health  
392 surveys on a larger scale. Finally, we used arbitrary thresholds to quantify droplets contamination  
393 based on CT values, proposing the highest sensibility for droplets detection. A lower threshold  
394 would have provided more specific data, or it could have been adapted to the different kind of  
395 transmission risks or expected hygiene levels in the different environments.

396

397

## 398 **Conclusions**

399 Environmental monitoring of fomites with a potential role in COVID-19 transmission, can be  
400 performed by RT-PCR. The general principle is based on the identification of anthropic  
401 contaminations by detecting their microbiota component.

402 Droplets and biological fluids were observed in most of the indoor places exposed to human  
403 presence, and on those surfaces frequently touched by hands. SARS-CoV-2 was not detectable  
404 diffusely in the environment, except in the proximity of an infected patient and in consistent  
405 association with fomites. The whole of the results supports the key role of handwashing and  
406 environmental sanitation in reducing risks related to indirect transmission of COVID-19 in  
407 hospitals or public areas, both indoor and outdoor. It also highlights the role of education and  
408 awareness in protecting the health of all.

409 In addition to searching for SARS-CoV-2 in the environment, the possibility to detect fomites by  
410 RT-PCR may provide a novel indicator for monitoring indirect transmission risks of COVID-19  
411 as well as other communicable diseases transmitted through droplets, such as flu or flu-like  
412 infections.

413

414

## 415 **Acknowledgments**

416 The authors would like to thank dr. Elena Scaramucci, Tiziana Zilli and Pietro Robert for  
417 supporting bibliography search and management; Alessandro Stabile for assuring laboratory safety  
418 and acceptance of reagents during summertime; the Copan Italia S.p.A. Brescia Italy for providing  
419 eNATand UTM collection kits. This study was partially supported by University of Foro Italico  
420 Project (CDR2.TER012013) assigned to V.R.S.

421

## 422 **References**

423 Aboubakr, H.A., Sharafeldin, T.A., Goya, S.M. 2020. Stability of SARS-CoV-2 and other  
424 coronaviruses in the environment and on common touch surfaces and the influence of climatic  
425 conditions: A review. *Transbound Emerg Dis.* 00:1-17 <https://doi.org/10.1111/tbed.13707>

426 Al Huraimel, K., Alhosani, M., Kunhabdulla, S., Stietiya, M. H. 2020. SARS-CoV-2 in the  
427 environment: Modes of transmission, early detection and potential role of pollutions. *The*  
428 *Science of the total environment.* 744, 140946. Advance online publication.  
429 <https://doi.org/10.1016/j.scitotenv.2020.140946>.

430 Arndt, D., Xia, J., Liu, Y., Zhou, Y., Guo, A.C., Cruz, J.A., Sinelnikov, I., Budwill, K., Nesbø,  
431 C.L., Wishart, D.S. 2012. METAGENassist: a comprehensive web server for comparative  
432 metagenomics. *Nucleic Acids Res.* 40, 88-95. <https://doi.org/10.1093/nar/gks497>

433 Asadi S, Wexler AS, Cappa CD, Barreda S, Bouvier NM, Ristenpart WD. 2020. Effect of  
434 voicing and articulation manner on aerosol particle emission during human speech. *PLoS*  
435 *One*;15(1): e0227699. doi: 10.1371/journal.pone.0227699. eCollection 2020.

436 Biryukov, J., Boydston, J.A., Dunning, R.A., Yeager, J.J, Wood, S., Reese, A.L., Ferris, Q.,  
437 Miller, D., Weaver, W., Zeitouni, N.E., Phillips, A., Freeburger, D., Hooper, I., Ratnesar-  
438 Shumate. S., Yolitz, J., Krause, M., Williams, G., Dawson, D.G., Herzog, A., Dabisch, P., Wahl,  
439 V., Hevey, M.C., Altamura, L.A. 2020. Increasing Temperature and Relative Humidity  
440 Accelerates Inactivation of SARS-CoV-2 on Surfaces. *mSphere.* 5(4):e00441-20. Published 2020  
441 Jul 1. <https://doi.org/10.1128/mSphere.00441-20>

- 442 Byrd, A.L., Belkaid, Y., Segre, J.A. 2018. The human skin microbiome. *Nature Reviews*  
443 *Microbiology*. 16,1436155. <https://doi.org/10.1038/nrmicro.2017.157>.
- 444 CDC, Centers for Disease Control and Prevention. 2020. CDC 2019-novel coronavirus (2019-  
445 nCoV) real-time RT-PCR diagnostic panel services. Centers for Disease Control and Prevention,  
446 Atlanta, GA. <https://www.fda.gov/media/134922/download> (access 10 August 2020).
- 447 Charles, D. D., Fisher, J. R., Hoskinson, S. M., Medina-Colorado, A. A., Shen, Y. C., Chaaban,  
448 M. R., Widen, S. G., Eaves-Pyles, T. D., Maxwell, C. A., Miller, A. L., Popov, V. L., & Pyles, R.  
449 B. 2019. Development of a Novel ex vivo Nasal Epithelial Cell Model Supporting Colonization  
450 with Human Nasal Microbiota. *Frontiers in cellular and infection microbiology*. 9, 165.  
451 <https://doi.org/10.3389/fcimb.2019.00165>.
- 452 Chen, Y., Chen, L., Deng, Q., Zhang, G., Wu, K., Ni, L., Yang, Y., Liu, B., Wang, W., Wei, C.,  
453 Yang, J., Ye, G., & Cheng, Z. 2020. The presence of SARS-CoV-2 RNA in the feces of COVID-  
454 19 patients. *Journal of medical virology*. 92(7), 8336840. <https://doi.org/10.1002/jmv.25825>.
- 455 Cheng, V.C.C., Wong, S.C., Chan, V.W.M., So, S.Y.C., Chen, J.H.K., Yip, C.C.Y., Chan, K.H.,  
456 Chu, H., Chung, T.W.H., Sridhar, S., To, K.K.W., Chan, J.F.W., Hung, I.F.N., Ho, P.L., Yuen,  
457 K.Y. Air and environmental sampling for SARS-CoV-2 around hospitalized patients with  
458 coronavirus disease 2019 (COVID-19). *Infect Control Hosp Epidemiol*. 1-32.  
459 <https://doi.org/10.1017/ice.2020.2822020>.
- 460 Chia, P.Y., Coleman, K.K., Tan, Y.K., Ong, S.W.X., Gum, M., Lau, S.K., Lim, X.F., Lim, A.S.,  
461 Sutjipto, S., Lee, P.H., Son, T.T., Young, B.E., Milton, D.K., Gray, G.C., Schuster, S., Barkham,  
462 T., De, P.P., Vasoo S., Chan, M., Ang, B.S.P., Tan, B.H., Leo, Y.S., Ng, O.T., Wong, M.S.Y.,  
463 Marimuthu, K., and for the Singapore 2019 Novel Coronavirus Outbreak Research Team. 2020.  
464 Detection of air and surface contamination by SARS-CoV-2 in hospital rooms of infected  
465 patients. *Nat Comm*. 11(1), 1-7. <https://doi.org/10.1038/s41467-020-16670-2>.
- 466 Colwell, R.K., Chao, A., Gotelli, N.J., Lin, S.Y., Mao, C.X., Chazdon, R.L., Longino, J.T. 2012.  
467 Models and estimators linking individual-based and sample-based rarefaction, extrapolation, and  
468 comparison of assemblages. *Journal of Plant Ecology*. 5, 3-21. <https://doi.org/10.1093/jpe/rtr044>.
- 469 Corman VM, Landt O, Kaiser M, Molenkamp R, Meijer A, Chu DK, Bleicker T, Brünink S,  
470 Schneider J, Schmidt ML, Mulders DG, Haagmans BL, van der Veer B, van den Brink S,  
471 Wijnsman L, Goderski G, Romette JL, Ellis J, Zambon M, Peiris M, Goossens H, Reusken C,

- 472 Koopmans MP, Drosten C. 2020. Detection of 2019 novel coronavirus (2019-nCoV) by real-  
473 time RT-PCR. *Euro surveillance: European communicable disease bulletin*, 25(3), 2000045.  
474 <https://doi.org/10.2807/1560-7917.ES.2020.25.3.2000045>.
- 475 Di Maria, F., Beccaloni, E., Bonadonna, L., Cini, C., Confalonieri, E., La Rosa, G., Milana, M.  
476 R., Testai, E., Scaini, F. 2020. Minimization of spreading of SARS-CoV-2 via household waste  
477 produced by subjects affected by COVID-19 or in quarantine. *The Science of the total*  
478 *environment*, 743, 140803. Advance online publication.  
479 <https://doi.org/10.1016/j.scitotenv.2020.140803>.
- 480 Esberg, A., Haworth, S., Kuja-Halkola, R., Magnusson, P., & Johansson, I. 2020. Heritability of  
481 Oral Microbiota and Immune Responses to Oral Bacteria. *Microorganisms*. 8(8), E1126.  
482 <https://doi.org/10.3390/microorganisms8081126>.
- 483 Eslami, H., Jalili, M. 2020. The role of environmental factors to transmission of SARS-CoV-2  
484 (COVID-19). *AMB Express*. 10(1), 92. <https://doi.org/10.1186/s13568-020-01028-0>
- 485 Farfour, E., Lesprit, P., Visseaux, B., Pascreau, T., Jolly, E., Houhou, N., Mazaux, L., Asso-  
486 Bonnet, M., Vasse, M., & SARS-CoV-2 Foch Hospital study group. 2020. The Allplex 2019-  
487 nCoV (Seegene) assay: which performances are for SARS-CoV-2 infection diagnosis? *European*  
488 *journal of clinical microbiology & infectious diseases: official publication of the European*  
489 *Society of Clinical Microbiology*, 10.1007/s10096-020-03930-8. Advance online publication.  
490 <https://doi.org/10.1007/s10096-020-03930-8>.
- 491 Foladori, P., Cutrupi, F., Segata, N., Manara, S., Pinto, F., Malpei, F., Bruni, L., La Rosa, G.  
492 2020. SARS-CoV-2 from faeces to wastewater treatment: What do we know? A review. *The*  
493 *Science of the total environment*. 743, 140444. Advance online publication.  
494 <https://doi.org/10.1016/j.scitotenv.2020.140444>.
- 495 Giampaoli, S., Alessandrini, F., Berti, A., Ripani, L., Choi, A., Crab, R., De Vittori, E., Egyed,  
496 B., Haas, C., Lee, H. Y., Korabecná, M., Noel, F., Podini, D., Tagliabracci, A., Valentini, A., &  
497 Romano Spica, V. 2014. Forensic interlaboratory evaluation of the ForFLUID kit for vaginal  
498 fluids identification. *Journal of forensic and legal medicine*. 21, 60663.  
499 <https://doi.org/10.1016/j.jflm.2013.10.016>.
- 500 Giampaoli, S., Berti, A., Valeriani, F., Gianfranceschi, G., Piccolella, A., Buggiotti, L., Rapone,  
501 C., Valentini, A., Ripani, L., & Romano Spica, V. 2012. Molecular identification of vaginal fluid

502 by microbial signature. *Forensic science international. Genetics*. 6(5), 5596564.  
503 <https://doi.org/10.1016/j.fsigen.2012.01.005>.

504 Guo, Z.D., Wang, Z.Y., Zhang, S.F., Li, X., Li, L., Li, C., Cui, Y., Fu, R.B., Dong, Y.Z., Chi,  
505 X.Y., Zhang, M.Y., Liu, K., Cao, C., Liu, B., Zhang, K., Gao, Y.W., Lu, B., Chen, W. 2020.  
506 Aerosol and Surface Distribution of Severe Acute Respiratory Syndrome Coronavirus 2 in  
507 Hospital Wards, Wuhan, China, 2020. *Emerg Infect Dis*. 26(7). [doi.org/10.3201/eid2607.200885](https://doi.org/10.3201/eid2607.200885)

508 Hung IF, Cheng VC, Li X, Tam AR, Hung DL, Chiu KH, Yip CC, Cai JP, Ho DT, Wong SC,  
509 Leung SS, Chu MY, Tang MO, Chen JH, Poon RW, Fung AY, Zhang RR, Yan EY, Chen LL,  
510 Choi CY, Leung KH, Chung TW, Lam SH, Lam TP, Chan JF, Chan KH, Wu TC, Ho PL, Chan  
511 JW, Lau CS, To KK, Yuen KY. 2020. SARS-CoV-2 shedding and seroconversion among  
512 passengers quarantined after disembarking a cruise ship: a case series. *The Lancet. Infectious*  
513 *diseases*, S1473-3099(20)30364-9. Advance online publication. [https://doi.org/10.1016/S1473-](https://doi.org/10.1016/S1473-3099(20)30364-9)  
514 [3099\(20\)30364-9](https://doi.org/10.1016/S1473-3099(20)30364-9).

515 Kampf, G., Todt, D., Pfaender, S., Steinmann, E. 2020. Persistence of coronaviruses on  
516 inanimate surfaces and their inactivation with biocidal agents. *The Journal of hospital infection*.  
517 104(3), 2466251. <https://doi.org/10.1016/j.jhin.2020.01.022>.

518 Kong, Y. 2011. Btrim: a fast, lightweight adapter and quality trimming program for next-  
519 generation sequencing technologies. *Genomics*. 98(2), 152-153.  
520 <https://doi.org/10.1016/j.ygeno.2011.05.009>.

521 Lee, Y. M., Kim, Y. J., Kim, D. Y., Park, K. H., Lee, M.S. 2020. Monitoring environmental  
522 contamination caused by SARS-CoV-2 in a healthcare facility by using adenosine triphosphate  
523 testing. *American journal of infection control*, S0196-6553(20)30631-3. Advance online  
524 publication. <https://doi.org/10.1016/j.ajic.2020.06.207>.

525 Li, H.Y., Fan, Y.Z., Jiang, L., Wang, H.B. 2020. Aerosol and environmental surface monitoring  
526 for SARS-Cov-2 RNA in a designated hospital for severe COVID-19 patients. *Epidemiology and*  
527 *Infection*, 148, e154, 1-5. <https://doi.org/10.1017/S0950268820001570>.

528 Liu, Q., Liu, Q., Meng, H., Lv, H., Liu, Y., Liu, J., Wang, H., He, L., Qin, J., Wang, Y., Dai, Y.,  
529 Otto, M., Li, M. 2020. Staphylococcus epidermidis Contributes to Healthy Maturation of the  
530 Nasal Microbiome by Stimulating Antimicrobial Peptide Production. *Cell host & microbe*. 27(1),  
531 68678.e5. <https://doi.org/10.1016/j.chom.2019.11.003>.

- 532 Liu, Y., Ning, Z., Chen, Y., Guo, M., Liu, Y., Gali, N. K., Sun, L., Duan, Y., Cai, J., Westerdahl,  
533 D., Liu, X., Xu, K., Ho, K. F., Kan, H., Fu, Q., & Lan, K. 2020. Aerodynamic analysis of SARS-  
534 CoV-2 in two Wuhan hospitals. *Nature*. 582(7813), 557-560. [https://doi.org/10.1038/s41586-](https://doi.org/10.1038/s41586-020-2271-2273)  
535 020-2271-2273.
- 536 Lloyd-Price, J., Abu-Ali, G. & Huttenhower, C. The healthy human microbiome. 2016. *Genome*  
537 *Med* 8, 51. <https://doi.org/10.1186/s13073-016-0307-y>.
- 538 Lv, J., Yang, J., Xue, J., Zhu, P., Liu, L., & Li, S. 2020. Detection of SARS-CoV-2 RNA residue  
539 on object surfaces in nucleic acid testing laboratory using droplet digital PCR. *The Science of the*  
540 *total environment*, 742, 140370. Advance online publication.  
541 <https://doi.org/10.1016/j.scitotenv.2020.140370>.
- 542 Magurran, A.E. *Measuring biological diversity*. Wiley-Blackwell: Oxford, UK; 2016.
- 543 Morawska L, Tang JW, Bahnfleth W, Bluysen PM, Boerstra A, Buonanno G, Cao J, Dancer S,  
544 Floto A, Franchimon F, Haworth C, Hogeling J, Isaxon C, Jimenez JL, Kurnitski J, Li Y,  
545 Loomans M, Marks G, Marr LC, Mazzarella L, Melikov AK, Miller S, Milton DK, Nazaroff W,  
546 Nielsen PV, Noakes C, Peccia J, Querol X, Sekhar C, Seppänen O, Tanabe SI, Tellier R, Tham  
547 KW, Wargocki P, Wierzbicka A, Yao M. 2020. How can airborne transmission of COVID-19  
548 indoors be minimised? *Environment International*, 142, 105832.  
549 <https://doi.org/10.1016/j.envint.2020.105832>
- 550 Mucci, N., Gianfranceschi, G., Cianfanelli, C., Santucci, S., Romano Spica, V., Valeriani, F.  
551 2020. Can air microbiota be a novel marker for public health? A sampling model and preliminary  
552 data from different environments. *Aerobiologia*, 36 (1): 71-75.
- 553 NCIRD, National Center for Immunization and Respiratory Diseases (NCIRD). 2020. How  
554 COVID-19 spreads () <https://www.cdc.gov/coronavirus/2019-ncov/about/transmission.html>  
555 (accessed 10 August 2020)
- 556 Ong, S.W.X., Tan, Y.K., Chia, P.Y., Lee, T.H., Ng, O.T., Wong, M.S.Y., Marimuthu, K. 2020.  
557 Air, Surface Environmental, and Personal Protective Equipment Contamination by Severe Acute  
558 Respiratory Syndrome Coronavirus 2 (SARS-CoV-2) From a Symptomatic Patient. *JAMA*.  
559 323(16):1610-1612. <https://doi.org/10.1001/jama.2020.3227>.
- 560 Otter, J. A., Donskey, C., Yezli, S., Douthwaite, S., Goldenberg, S. D., Weber, D. J. 2016.  
561 *Transmission of SARS and MERS coronaviruses and influenza virus in healthcare settings: the*



- 562 possible role of dry surface contamination. *The Journal of hospital infection*. 92(3), 235-250.  
563 <https://doi.org/10.1016/j.jhin.2015.08.027>.
- 564 Pasquarella, C., Colucci, M. E., Bizzarro, A., Veronesi, L., Affanni, P., Meschi, T., Brianti, E.,  
565 Vitali, P., & Albertini, R. 2020. Detection of SARS-CoV-2 on hospital surfaces. *Acta bio-medica*  
566 *Atenei Parmensis*, 91(9-S), 766-78. <https://doi.org/10.23750/abm.v91i9-S.10137>.
- 567 Petersen, E., Koopmans, M., Go, U., Hamer, D.H., Petrosillo, N., Castelli, F., Storgaard, M., Al  
568 Khalili, S., Simonsen, L. 2020. Comparing SARS-CoV-2 with SARS-CoV and influenza  
569 pandemics *Lancet Infect Dis*. [https://doi.org/10.1016/S1473-3099\(20\)30484-9](https://doi.org/10.1016/S1473-3099(20)30484-9).
- 570 Proctor, L., Lo Tempio, J., Marquitz, A., Daschner, P., Xi, D., Flores, R., Brown, L., Ranallo, R.,  
571 Maruvada, P., Regan, K., Lunsford, R.D., Reddy, M., Caler, L. 2019. A review of 10 years of  
572 human microbiome research activities at the US National Institutes of Health, Fiscal Years 2007-  
573 2016. *Microbiome* 7, 31. <https://doi.org/10.1186/s40168-019-0620-y>.
- 574 Ratnesar-Shumate, S., Williams, G., Green, B., Krause, M., Holland, B., Wood, S., Bohannon, J.,  
575 Boydston, J., Freeburger, D., Hooper, I., Beck, K., Yeager, J., Altamura, LA., Biryukov, J.,  
576 Yolitz, J., Schuit, M., Wahl, V., Hevey, M., Dabisch, P. 2020. Simulated sunlight rapidly  
577 inactivates SARS-COV-2 on surfaces. *J Infect Dis*. 222(2):214-222.  
578 <https://doi.org/10.1093/infdis/jiaa274>.
- 579 Razzini, K., Castrica, M., Menchetti, L., Maggi, L., Negroni, L., Orfeo, N. V., Pizzoccheri, A.,  
580 Stocco, M., Muttini, S., Balzaretto, C. M. 2020. SARS-CoV-2 RNA detection in the air and on  
581 surfaces in the COVID-19 ward of a hospital in Milan, Italy. *The Science of the total*  
582 *environment*, 742, 140540. Advance online publication.  
583 <https://doi.org/10.1016/j.scitotenv.2020.140540>.
- 584 Segre, J.A. 2013. What does it take to satisfy Koch's postulates two centuries later? *Microbial*  
585 *genomics and Propionibacteria acnes*. *J Invest Dermatol*. 133(9), 2141-2142.  
586 <https://doi.org/10.1038/jid.2013.260>
- 587 Slatko BE, Gardner AF, Ausubel FM. 2018. Overview of Next-Generation Sequencing  
588 Technologies. *Curr Protoc Mol Biol*. 2018 Apr;122(1):e59. <https://doi.org/10.1002/cpmb.59>.

- 589 Somsen, G. A., van Rijn, C., Kooij, S., Bem, R. A., & Bonn, D. 2020. Small droplet aerosols in  
590 poorly ventilated spaces and SARS-CoV-2 transmission. *The Lancet. Respiratory medicine*, 8(7),  
591 658-659. [https://doi.org/10.1016/S2213-2600\(20\)30245-9](https://doi.org/10.1016/S2213-2600(20)30245-9).
- 592 Stadnytskyi, V., Bax, C. E., Bax, A., & Anfinrud, P. 2020. The airborne lifetime of small speech  
593 droplets and their potential importance in SARS-CoV-2 transmission. *Proceedings of the*  
594 *National Academy of Sciences of the United States of America*. 117(22), 11875-11877.  
595 <https://doi.org/10.1073/pnas.2006874117>.
- 596 Valeriani, F., Protano, C., Gianfranceschi, G., Cozza, P., Campanella, V., Liguori, G., Vitali, M.,  
597 Divizia, M., Romano Spica, V. 2016. Infection control in healthcare settings: perspectives for  
598 mfDNA analysis in monitoring sanitation procedures. *BMC infectious diseases*. 16, 394.  
599 <https://doi.org/10.1186/s12879-016-1714-9>.
- 600 Valeriani, F., Agodi, A., Casini, B., Cristina, M. L., D'Errico, M. M., Gianfranceschi, G.,  
601 Liguori, G., Liguori, R., Mucci, N., Mura, I., Pasquarella, C., Piana, A., Sotgiu, G., Privitera, G.,  
602 Protano, C., Quattrocchi, A., Ripabelli, G., Rossini, A., Spagnolo, A. M., Tamburro, M., Romano  
603 Spica, V., GISIO Working Group of the Italian Society of Hygiene, Preventive Medicine, and  
604 Public Health. 2018a. Potential testing of reprocessing procedures by real-time polymerase chain  
605 reaction: A multicenter study of colonoscopy devices. *American journal of infection control*.  
606 46(2), 159-164. <https://doi.org/10.1016/j.ajic.2017.08.008>.
- 607 Valeriani, F., Crognale, S., Protano, C., Gianfranceschi, G., Orsini, M., Vitali, M., Romano  
608 Spica, V. 2018b. Metagenomic analysis of bacterial community in a travertine depositing hot  
609 spring. *The new microbiologica*, 41(2), 126-135.
- 610 Valeriani, F., Protano, C., Gianfranceschi, G., Leoni, E., Galasso, V., Mucci, N., Romano Spica,  
611 V. 2018c. Microflora Thermarum Atlas project: Biodiversity in thermal spring waters and natural  
612 SPA pools. *Water Science and Technology: Water Supply*. 18: 1472-1483.
- 613 Valeriani, F., Margarucci, L. M., Gianfranceschi, G., Ciccarelli, A., Tajani, F., Mucci, N.,  
614 Ripani, M., & Romano Spica, V. 2019. Artificial-turf surfaces for sport and recreational  
615 activities: microbiota analysis and 16S sequencing signature of synthetic vs natural soccer fields.  
616 *Heliyon*, 5(8), e02334. <https://doi.org/10.1016/j.heliyon.2019.e02334>.
- 617 Van Doremalen, N., Bushmaker, T., Morris, D.H., Holbrook, M.G., Gamble, A., Williamson,  
618 B.N., Tamin, A., Harcourt, J.L., Thornburg, N.J., Gerber, S.I., Lloyd-Smith, J.O., de Wit, E.,

- 619 Munster, V.J. 2020. Aerosol and surface stability of SARS-CoV-2 as compared with SARS-  
620 CoV-1. *N Engl J Med.* 382, 1564-1567. <https://doi.org/10.1056/NEJMc2004973>.
- 621 Veronesi, L., Colucci, M.E., Pasquarella, C., Caruso, L., Mohieldin Mahgoub Ibrahim, M., Zoni,  
622 R., Pergreffi, M., Arcuri, C., Seidenari, C., Viani, I., Capobianco, E., Mezzetta, S., Affanni, P.  
623 2020. Virological surveillance of SARS-CoV-2 in an Italian northern area: comparison of Real  
624 Time RT PCR cycle threshold (Ct) values in three epidemic periods. *Acta Biomed.* 2020 Jul  
625 20;91(9-S):19-21. <https://doi.org/10.23750/abm.v91i9-S.10138>.
- 626 Wang, J., Feng, H., Zhang, S., Ni, Z., Ni, L., Chen, Y., Zhuo, L., Zhong, Z., & Qu, T. 2020.  
627 SARS-CoV-2 RNA detection of hospital isolation wards hygiene monitoring during the  
628 Coronavirus Disease 2019 outbreak in a Chinese hospital. *International journal of infectious  
629 diseases: IJID: official publication of the International Society for Infectious Diseases.* 94, 1036  
630 106. <https://doi.org/10.1016/j.ijid.2020.04.024>.
- 631 Wei, L., Lin, J., Duan, X., Huang, W., Lu, X., Zhou, J., Zong, Z. 2020. Asymptomatic COVID-  
632 19 Patients Can Contaminate Their Surroundings: An Environment Sampling Study. *mSphere.*  
633 5(3), e00442-20. <https://doi.org/10.1128/mSphere.00442-20>.
- 634 WHO, World Health Organization. 2020. Transmission of SARS-CoV-2: implications for  
635 infection prevention precautions. *Scientific Brief.* [https://www.who.int/news-  
636 room/commentaries/detail/transmission-of-sars-cov-2-implications-for-infection-prevention-  
637 precautions](https://www.who.int/news-room/commentaries/detail/transmission-of-sars-cov-2-implications-for-infection-prevention-precautions) (accessed 10 August 2020).
- 638 WHO, World Health Organization. *Infection Prevention and Control of Epidemic-and Pandemic-  
639 prone Acute Respiratory Infections in Health Care.* Geneva: World Health Organization; 2014  
640 [https://apps.who.int/iris/bitstream/handle/10665/112656/9789241507134\\_eng.pdf;jsessionid=41  
641 AA684FB64571CE8D8A453C4F2B2096?sequence=1](https://apps.who.int/iris/bitstream/handle/10665/112656/9789241507134_eng.pdf;jsessionid=41AA684FB64571CE8D8A453C4F2B2096?sequence=1) (access 10 August 2020).
- 642 Wu, S., Wang, Y., Jin, X., Tian, J., Liu, J., Mao, Y. 2020. Environmental contamination by  
643 SARS-CoV-2 in a designated hospital for coronavirus disease 2019. *American journal of  
644 infection control.* 48(8), 9106914. <https://doi.org/10.1016/j.ajic.2020.05.003>.
- 645 Yao, T., Han, X., Guan, T., Wang, Z., Zhang, S., Liu, C., Liu, C., Chen, L. 2020. Effect of  
646 indoor environmental exposure on seminal microbiota and its application in body fluid  
647 identification. *Forensic science international.* 314, 110417. Advance online publication.  
648 <https://doi.org/10.1016/j.forsciint.2020.110417>.



650

**Table 1**

| <i>Classification</i>        | <i>Samples</i>              | <b>Dataset (N=94)</b>         | <b>Description</b>             | <b>Nucleic Acid Testing</b> |                   |                  |
|------------------------------|-----------------------------|-------------------------------|--------------------------------|-----------------------------|-------------------|------------------|
|                              |                             |                               |                                | SARS-CoV-2                  | Biofluid (RT-PCR) | Microbiota (NGS) |
| <b>Indoor</b>                | <b>Hospital</b>             | <b>49</b>                     | Floor (n=7)                    | +                           | +                 | +                |
|                              |                             |                               | Bedside table (n=3)            | +                           | +                 | +                |
|                              |                             |                               | Door handle (n=3)              | +                           | +                 | +                |
|                              |                             |                               | Call button (n=1)              | +                           | +                 | +                |
|                              |                             |                               | Table (n=1)                    | +                           | +                 | +                |
|                              |                             |                               | Chair (n=2)                    | +                           | +                 | +                |
|                              |                             |                               | Back of the bed (n=3)          | +                           | +                 | +                |
|                              |                             |                               | Side of bed (n=4)              | +                           | +                 | +                |
|                              |                             |                               | Bottom of the bed (n=1)        | +                           | +                 | +                |
|                              |                             |                               | Wall behind the bed head (n=1) | +                           | +                 | +                |
|                              |                             |                               | Bed sheets (n=1)               | +                           | +                 | +                |
|                              |                             |                               | Pillow (n=2)                   | +                           | +                 | +                |
|                              |                             |                               | Stethoscope (n=1)              | +                           | +                 | +                |
|                              |                             |                               | Wheelchair head (n=1)          | +                           | +                 | +                |
|                              |                             |                               | Toilet board (n=1)             | +                           | +                 | +                |
|                              |                             |                               | Toilet flush button (n=1)      | +                           | +                 | +                |
|                              |                             |                               | Sink faucet (n=1)              | +                           | +                 | +                |
|                              | Air circulation system (15) | +                             | -                              | -                           |                   |                  |
|                              | <b>Public Building</b>      | <b>25</b>                     | Door handle (n=2)              | ±                           | +                 | +                |
|                              |                             |                               | Toilet (n=2)                   | +                           | +                 | +                |
| Pews (n=4)                   |                             |                               | -                              | +                           | +                 |                  |
| Floor (n=6)                  |                             |                               | ±                              | +                           | +                 |                  |
| Toilet wall tiles (n=3)      |                             |                               | ±                              | +                           | +                 |                  |
| Office phone (n=1)           |                             |                               | +                              | +                           | +                 |                  |
| Computer keyboard (n=2)      |                             |                               | +                              | +                           | +                 |                  |
| Air circulation system (n=5) |                             |                               | -                              | +                           | +                 |                  |
| <b>Outdoor</b>               | <b>16</b>                   | Handrail (n=1)                | +                              | +                           | +                 |                  |
|                              |                             | Grip shared e-scooter (n=1)   | +                              | +                           | +                 |                  |
|                              |                             | Bus stop bench (n=1)          | +                              | +                           | +                 |                  |
|                              |                             | Coffee dispenser button (n=1) | +                              | +                           | +                 |                  |
|                              |                             | External door handle (n=2)    | ±                              | +                           | +                 |                  |
| <b>Human</b>                 | <b>4</b>                    | Droplets/biofluid (n=4)       | ±                              | +                           | +                 |                  |

651

652 **Table 1. Environmental sampling: dataset of collected samples and testing.** Indoor surfaces were  
 653 sampled from different hospitals (n=3), buildings of public use (1 office, 1 Fast food, 1 church), outdoor  
 654 areas (n=16), nose-oropharyngeal secretions (n=4) and tested for presence of SARS-CoV-2 and for  
 655 anthropic contamination by testing the presence of microbiota traces of biological fluids (Nose, Saliva,  
 656 Feces), by Real Time PCR (RT-PCR) and/or Next Generation Sequencing (NGS). For each type of test,  
 657 analysis was performed in all (+), no one (-) or some (±) of the collected samples.

658  
659

**Table 2**

| <b>ANTROPIC CONTAMINATION FROM BIOFLUIDS &amp; MICROBIOTA</b> |             |             |                    |                   |              |                           |
|---------------------------------------------------------------|-------------|-------------|--------------------|-------------------|--------------|---------------------------|
| <i>Sample source</i>                                          | <i>Code</i> | <i>Skin</i> | <b>Droplets</b>    |                   | <i>Feces</i> | <i>Sample description</i> |
|                                                               |             |             | <i>Nasopharynx</i> | <i>Oropharynx</i> |              |                           |
| <i>Controls (n=4)</i>                                         | A_01        | -           | +++                | -                 | -            | Droplets & biofluid       |
|                                                               | A_02        | ++++        | +++++              | +                 | -            | Droplets & biofluid       |
|                                                               | A_03        | ++++        | +++++              | ++                | -            | Droplets & biofluid       |
|                                                               | A_04        | ++++        | +++++              | +                 | -            | Droplets & biofluid       |
| <i>Outdoor (n=6)</i>                                          | Z_01        | +++         | +++                | -                 | +            | Handrail                  |
|                                                               | Z_02        | +/-         | +                  | -                 | -            | Bus stop bench            |
|                                                               | Z_03        | ++          | ++                 | -                 | +/-          | Shared e-scooter grip     |
|                                                               | Z_04        | -           | +                  | -                 | -            | External door handle      |
|                                                               | Z_05        | ++          | +                  | -                 | +/-          | External door handle      |
|                                                               | Z_06        | ++          | +                  | -                 | -            | Coffee dispenser          |
| <i>Indoor (n=55)</i>                                          | YH1_01      | +++         | ++                 | +                 | +            | Right bed rail*           |
|                                                               | YH1_02      | +++         | ++                 | +/-               | +/-          | Bedside table             |
|                                                               | YH1_03      | ++          | +++                | ++++              | +++          | Door handle               |
|                                                               | YH1_04      | ++          | +++                | -                 | +/-          | Floor                     |
|                                                               | YH1_05      | ++          | ++++               | +                 | +++          | Call button*              |
|                                                               | YH1_06      | ++          | ++                 | -                 | -            | Table                     |
|                                                               | YH1_07      | -           | ++                 | -                 | -            | Chair                     |
|                                                               | YH1_08      | -           | +++                | -                 | -            | Back of the bed           |
|                                                               | YH1_09      | -           | ++                 | -                 | -            | Air inlet socket          |
|                                                               | YH1_10      | +++         | ++                 | +++               | -            | Wall behind the bed       |
|                                                               | YH1_11      | +++         | +++                | +++               | ++           | Left bed rail             |
|                                                               | YH1_12      | -           | +++                | -                 | -            | Stethoscope*              |
|                                                               | YH1_13      | -           | +++                | -                 | -            | Bottom of the bed         |
|                                                               | YH1_14      | +           | ++++               | -                 | +/-          | Wheelchair head           |
|                                                               | YH2_15      | ++++        | ++                 | -                 | -            | Pillow                    |
|                                                               | YH2_16      | -           | +                  | -                 | -            | Chair                     |
|                                                               | YH2_17      | -           | +                  | -                 | -            | Back of the bed           |
|                                                               | YH2_18      | -           | +/-                | -                 | +/-          | Toilet board              |
|                                                               | YH2_19      | -           | +/-                | -                 | +            | Sink faucet               |
|                                                               | YH2_20      | -           | ++                 | -                 | -            | Floor                     |
|                                                               | YH2_21      | +           | +/-                | -                 | -            | Floor                     |
|                                                               | YH2_22      | -           | ++                 | ++++              | -            | Floor                     |
|                                                               | YH2_23      | -           | +                  | -                 | -            | Door handle               |
|                                                               | YH2_24      | +++         | ++                 | -                 | +/-          | Back of the bed           |
|                                                               | YH2_25      | ++          | +                  | ++++              | -            | Side of bed               |
|                                                               | YH2_26      | +           | +                  | -                 | +++          | Side of bed               |
|                                                               | YH2_27      | -           | -                  | -                 | -            | Bedside table             |
|                                                               | YH2_28      | -           | +/-                | -                 | +            | Bedside table             |

## ANTHROPIC CONTAMINATION FROM BIOFLUIDS & MICROBIOTA

| Sample source | Code   | Skin  | Droplets    |            | Feces | Sample description  |
|---------------|--------|-------|-------------|------------|-------|---------------------|
|               |        |       | Nasopharynx | Oropharynx |       |                     |
|               | YH2_29 | -     | ++          | -          | -     | Pillow              |
|               | YH2_30 | -     | +           | -          | -     | Bed sheets          |
|               | YH2_31 | +     | ++          | -          | -     | Floor               |
|               | YH2_32 | -     | ++          | -          | -     | Floor               |
|               | YH2_33 | -     | +           | -          | -     | Floor               |
|               | YH3_34 | +++++ | ++++        | -          | -     | Toilet              |
|               | YH3_35 | -     | ++          | -          | -     | Toilet              |
|               | YH3_36 | +/-   | -           | -          | -     | Door handle         |
|               | YC_37  | -     | +           | -          | -     | Pew and surface     |
|               | YC_38  | -     | +           | -          | -     | Pew and surface     |
|               | YC_39  | -     | +           | -          | -     | Pew and surface     |
|               | YC_40  | ++    | ++++        | +          | -     | Pew and surface     |
|               | YO_41  | -     | -           | -          | +     | Floor               |
|               | YO_42  | -     | -           | +/-        | +/-   | Floor               |
|               | YO_43  | -     | -           | -          | +     | Floor               |
|               | YO_44  | -     | -           | -          | +     | Floor               |
|               | YO_45  | -     | -           | -          | -     | Floor               |
|               | YO_46  | -     | -           | -          | +     | Floor               |
|               | YO_47  | -     | -           | -          | +/-   | Toilet wall tiles   |
|               | YO_48  | -     | -           | -          | +     | Toilet wall tiles   |
|               | YO_49  | -     | -           | -          | +     | Toilet wall tiles   |
|               | YO_50  | -     | -           | -          | +/-   | Office phone        |
|               | YO_51  | -     | -           | -          | +     | Computer Keyboard   |
|               | YO_52  | +/-   | -           | -          | +     | Computer Keyboard   |
|               | YO_53  | +     | +           | +          | +     | Elevator handle     |
|               | YO_54  | +++   | +++         | +          | +/-   | Toilet door handle  |
|               | YO_55  | ++    | ++          | -          | -     | Toilet flush button |

660 **Table 2. Anthropic contamination by Real Time PCR.** The cumulative output of indicators for  
661 each anthropic contamination is shown, including the description of each sample. For each  
662 indicator: +++ Positive: Ct <20; ++ Positive: Ct 20-30; + Positive Ct 30-35; +/- Doubt:  
663 Ct 36-38; - Negative Ct >39. For *E. faecalis*: +++ Positive: Ct <20; ++ Positive Ct 21-29; +/-  
664 - Doubt: Ct 30-35; - Negative Ct >36. The asterisk (\*) shows the sampling points where SARS-  
665 CoV-2 RNA was detected. Sample reading code: A: anthropic, Z: outdoor; Y: indoor (H: hospital;  
666 C: church; O: office and restaurant).

667

668

669  
670  
671  
672  
673  
674  
675  
676  
677  
678  
679  
680  
681  
682  
683  
684  
685  
686  
687

**Table 3**

| <b>RT-PCR Droplets' Markers</b> |                                   |             |             |             |
|---------------------------------|-----------------------------------|-------------|-------------|-------------|
| <b>Origin</b>                   | <b>Indicators</b>                 | <b>RC1</b>  | <b>RC2</b>  | <b>RC3</b>  |
| <i>Nasopharynx</i>              | <i>Propinumbacterium spp</i>      | <b>0.93</b> | 0.05        | -0.01       |
|                                 | <i>Corynebacterium spp</i>        | <b>0.66</b> | -0.03       | 0.39        |
| <i>Oropharynx</i>               | <i>Streptococcus mutans</i>       | 0.21        | <b>0.76</b> | 0.11        |
|                                 | <i>Staphylococcus salivarius</i>  | 0.02        | <b>0.89</b> | -0.15       |
| <i>Nostril-skin</i>             | <i>Staphylococcus aureus</i>      | 0.06        | 0.30        | <b>0.80</b> |
|                                 | <i>Staphylococcus epidermidis</i> | 0.13        | -0.07       | <b>0.88</b> |

**Table 3. Primary indicators for droplets.** Pattern matrix for principal component analysis nasopharynx selected indicators (*Propinumbacterium spp.*, *Corynebacterium spp.*), oropharynx (*Streptococcus mutans*, *Staphylococcus salivarius*), of nostril-skin (*Staphylococcus aureus*, *Staphylococcus epidermidis*). The higher correlations for each component (RC) are shown in bold (p<0.01). The table reported variable loading on the rotation matrix.



688

Figure 1

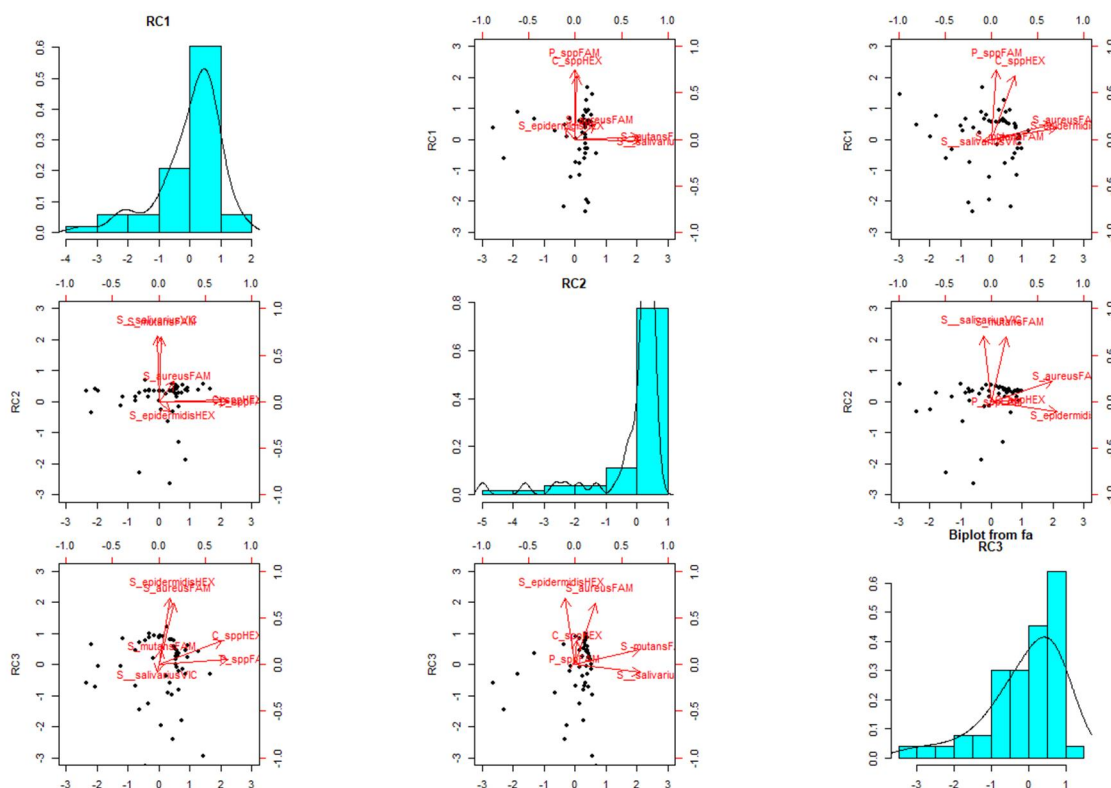

689

690

691

692

693

694 **Figure 1. Droplets components distribution.** Principal Component Analysis biplots showing  
695 Component 1 versus Component 2, Component 1 versus Component 3 and Component 2 versus  
696 Component 3. The first, second, and third component explain 28%, 27%, and 27% of the variability  
697 observed, respectively. The role of the bacterial indicators within the different components is  
698 summarized by vectors within the scatter graphs.

699

700

Figure 2

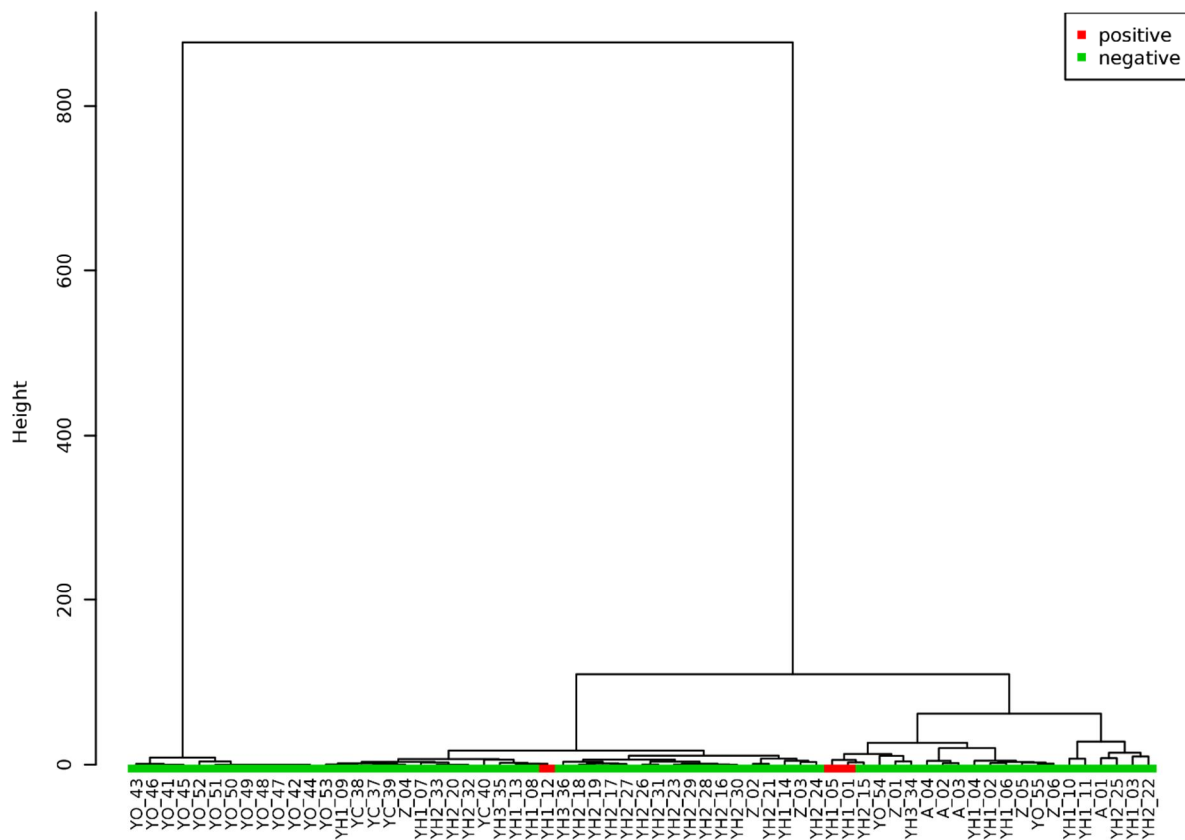

701

702

703 **Figure 2. Hierarchical cluster analysis on Real Time PCR results.** SARS-CoV-2 positive and  
704 negative samples are indicated in green and red, respectively. The hierarchical cluster was  
705 performed on raw CT data by Euclidean distance and Ward's linkage (clustering to minimize the  
706 sum of squares of any two clusters).

707

708

Figure 3

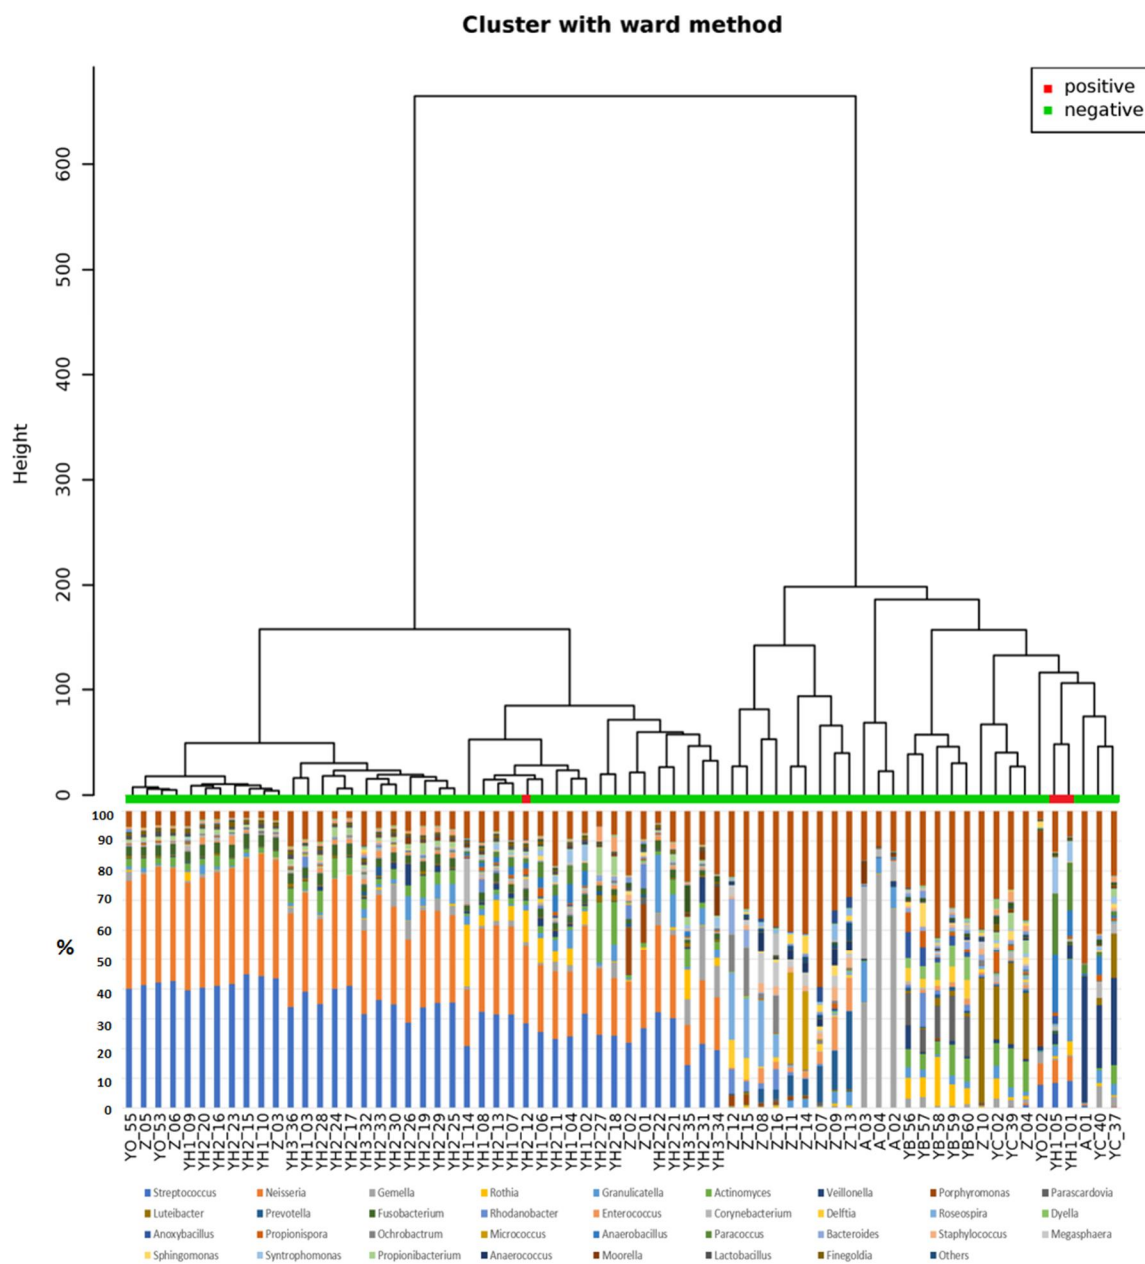

709

710

711 **Figure 3. Hierarchical Clustering Dendrogram on 16S amplicon sequencing data.**  
712 Dendrogram shows a hierarchical clustering of samples based on genus-level classifications. The  
713 bar chart under each sample summarizes the relative abundance of its genus-level classifications.  
714 In this analysis were included also environmental samples from playgrounds (Z\_07-16) and indoor  
715 air (YB\_56-60), without major anthropic contaminations. SARS-CoV-2 negative and positive  
716 samples are indicated in green and red, respectively.

717

718

Figure 4

719

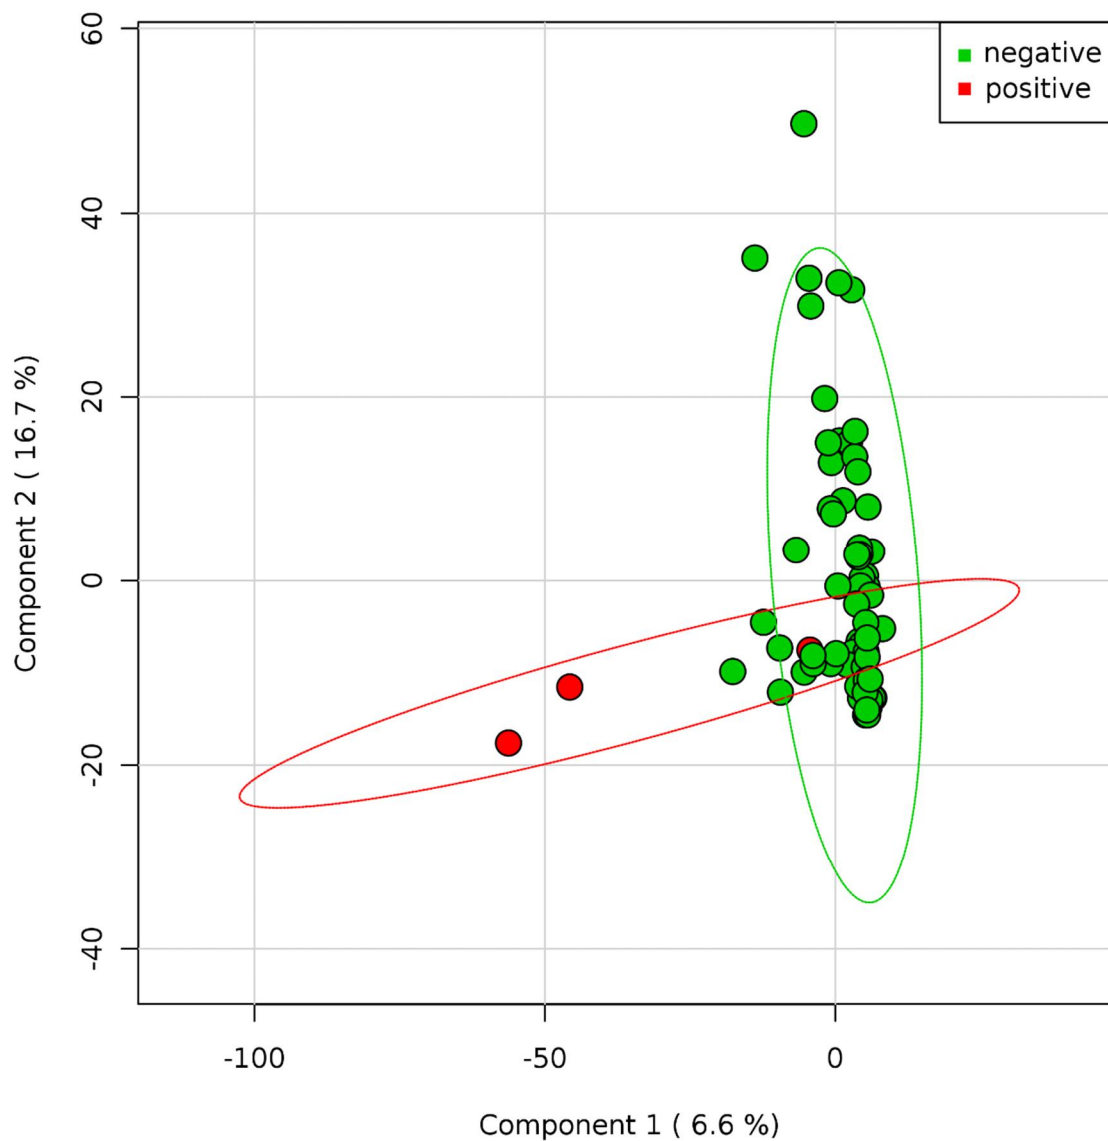

720

721

722 **Figure 4. SARS-CoV-2 positive and negative samples.** Principal Coordinate Analysis of the  
723 normalized relative abundance of all samples divided by negative and positive results of SARS-  
724 COV2. Data are plotted at the genus-level classification. The variance is explained for 6.6% and  
725 16.7%, respectively for Component 1 and 2. SARS-CoV-2 positive (red) and negative (green)  
726 samples.

727

728

Figure 5

729

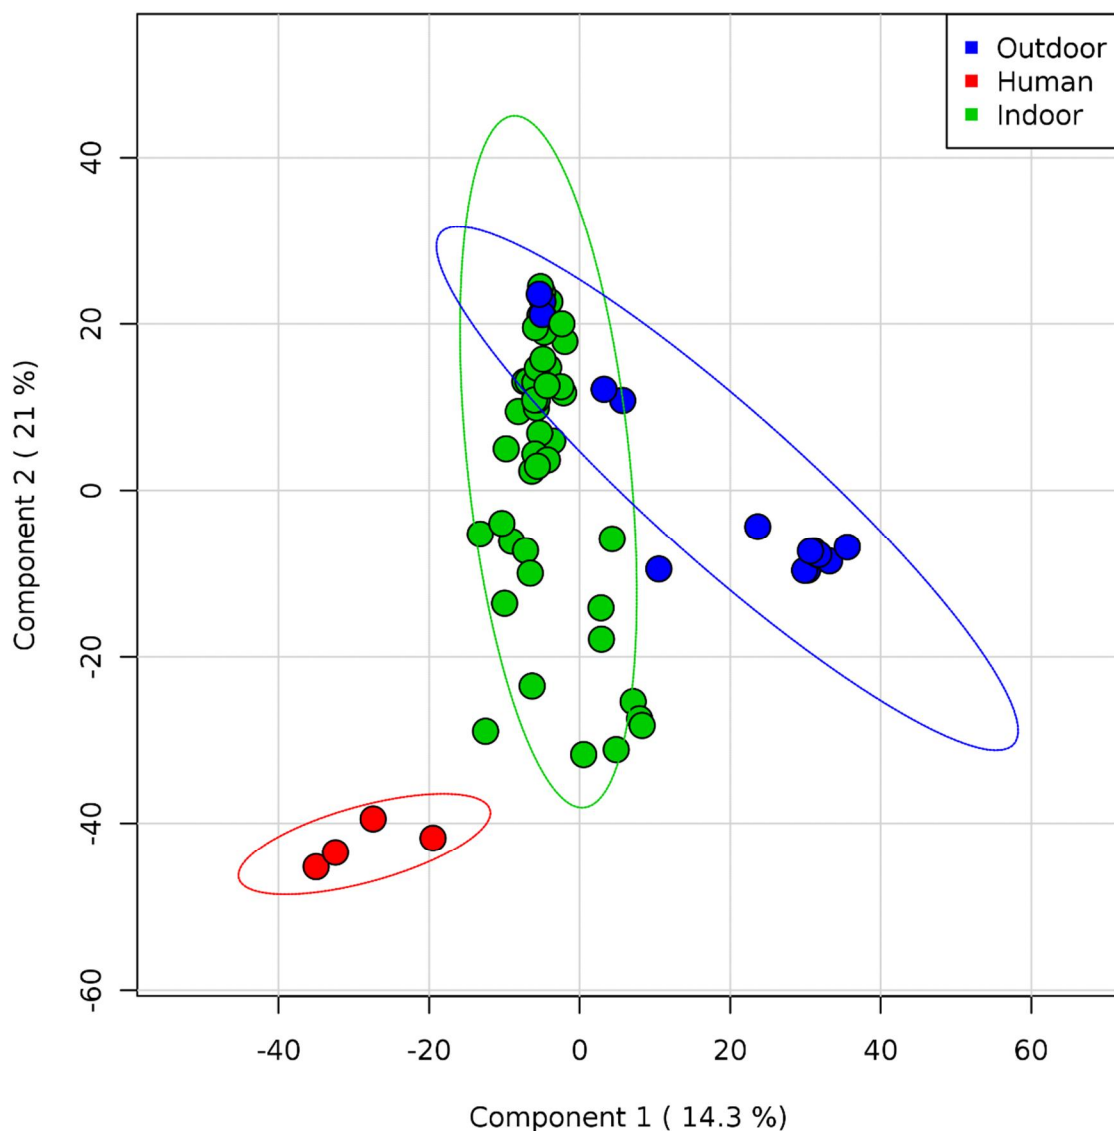

730

731 **Figure 5. Whole microflora analysis of indoor and outdoor samples.** Partial least square-  
732 discriminant analysis (PLS-DA) shows Pearson distance between different samples using  
733 phylogeny distribution based on 16S rRNA genes. Samples are colored according to the sampling  
734 point (red: human droplets; green: indoor; blue: outdoor). The variance is explained for 14.3 %  
735 and 21 %, respectively for Component 1 and 2. Outdoor samples overlapping indoor samples are  
736 characterized by fomites, whereas the blue sample between groups is the outdoor handle of a  
737 building main entrance. All samples without a major presence of environmental microflora, but  
738 characterized by a prevalence of human microbiota from droplets biofluids, tend to segregate  
739 independently.
